# Supplementary material for: Factors associated with SARS-CoV-2 infection in unvaccinated children and young adults
Source: Springer Nature journal article supplement (doi:10.1186/s12879-023-08950-1), 2024-01-15
Supplement: MOESM3 [file 26629224]

 **Baseline Survey**

Record ID:

**BACKGROUND INFORMATION**

Please answer the following questions about yourself.

**PARENTS: if you are answering this survey on behalf of your child, please answer the questions in relation to your child.**

What is your (your child's) age?

 Years Months

You (your child) must be under 25 years old to participate in this study. If you (your child) are 25 years old or older, please contact the SPRING study team.

If you are entering a child's age, please enter in months if under 2 years of age.

What sex were you (your child) assigned at birth?

\* must provide value

- Male
- Female
- Intersex
- Prefer to self-describe as:
- Prefer not to answer

What best describes your (your child's) gender:

\* must provide value

- Man/boy
- Woman/girl
- Non-binary, GenderQueer, Agender or similar identity
- Two-spirit
- Prefer to self-describe as:
- Prefer not to answer

What are the first three digits of your postal code?

(e.g. V5H) \* must provide value

What best describes your (your child's) ethnicity?  
(tick all that apply)

\* must provide value

- Indigenous (First Nations, Metis, Inuk/Inuit)
- White
- Chinese
- South Asian (East Indian, Pakistani, Sri Lankan, etc)
- Black (African, African-American)
- Filipino
- Latin, Central and South American
- Southeast Asian (Vietnamese, Cambodian, Malaysian, Laotian, etc.)
- Arabic
- West Asian (Iranian, Afghan, etc.)
- Korean
- Japanese
- Alaskan Native
- Native Hawaiian or other Pacific Islander
- Other, specify:
- Prefer not to answer

Do you (your child) have any current medical conditions?

\* must provide value

 Yes No

reset

Please list your (your child's) current medical condition(s):

Are you (your child) currently taking any prescription medication?

\* must provide value

 Yes No Prefer not to answer

reset

Please list the name of the prescription medication(s):

**Baseline Survey**

Since January 2020, did you (your child) leave the home to go to:  
 \* must provide value

- Work (choose all that apply)
  - Healthcare worker
  - Essential worker (e.g. postal, grocery, delivery)
  - Personal service provider (e.g. hairdresser/barber, esthetician)
  - Teacher, Principal, School counselor etc.
  - Other, specify:
- School (choose level of schooling)
  - Preschool
  - Elementary/Primary
  - Secondary/High school
  - Post secondary (college, university or technical institute)
- Daycare
- Other, specify:
- None of the above
- Prefer not to answer

**In the last 6 months, on average, how many times per week do you (your child) use the following transportation?**

|                                                                                                  | never                 | less than 1/week      | 1-2 times/week        | 3-4 times/week        | 5-6 times/week        | daily                 |
|--------------------------------------------------------------------------------------------------|-----------------------|-----------------------|-----------------------|-----------------------|-----------------------|-----------------------|
| <b>Public transportation</b><br>* must provide value                                             | <input type="radio"/> | <input type="radio"/> | <input type="radio"/> | <input type="radio"/> | <input type="radio"/> | <input type="radio"/> |
| <b>Another's private vehicle (such as taxi, car pooling, ride share)</b><br>* must provide value | <input type="radio"/> | <input type="radio"/> | <input type="radio"/> | <input type="radio"/> | <input type="radio"/> | <input type="radio"/> |

[reset](#) [reset](#)

**COVID-19 EXPOSURE INFORMATION**

Since January 2020, have you (your child) travelled outside of BC?  
 (tick all that apply)  
 \* must provide value

- Yes, within Canada
- Yes, outside Canada
- No
- Prefer not to answer

Which province did you (your child) travel to?  
 \* must provide value

- Alberta
- Manitoba
- New Brunswick
- Newfoundland and Labrador
- Northwest Territories
- Nova Scotia
- Nunavut
- Ontario
- Prince Edward Island
- Quebec
- Saskatchewan
- Yukon
- Prefer not to answer

How many total weeks did you (your child) spend outside of BC but within Canada?  
 \* must provide value

When did you (your child) last return to BC from within Canada?  
 \* must provide value

  Today D-M-Y

What country/countries did you (your child) travel to?  
 \* must provide value

How many total weeks did you (your child) spend outside of Canada?  
 \* must provide value

When did you (your child) last return to BC from outside Canada?  
 \* must provide value

  Today D-M-Y

**Baseline Survey**

**Have you (your child) ever had any exposure to a person who tested positive for COVID-19?**  Yes  
 No  
 I don't know  
 Prefer not to answer  
\* must provide value [reset](#)

**How many people have you (your child) been exposed to?**   
\* must provide value

**Exposure #1** **Please identify where the exposure occurred: (check all that apply)**

- Household member
- Non-household close contact (friend/other family)
- Health care setting (e.g. Dr. office, physiotherapis/chiropractor office, hospital)
- School, college, university
- Personal service provider (e.g. hair salon/barber, esthetician)
- Workplace
- Travel, where:
- Other, specify:
- Prefer not to answer

**When did this exposure occur?**  
 Month:  Year:

**At the time of exposure, do you think the person was still infectious (this is typically within the first 14 days of their illness)?**  
 Yes  
 No  
 I don't know  
 Prefer not to answer

**Exposure #2** **Please identify where the exposure occurred: (check all that apply)**

- Household member
- Non-household close contact (friend/other family)
- Health care setting (e.g. Dr. office, physiotherapis/chiropractor office, hospital)
- School, college, university
- Personal service provider (e.g. hair salon/barber, esthetician)
- Workplace
- Travel, where:
- Other, specify:
- Prefer not to answer

**When did this exposure occur?**  
 Month:  Year:

**At the time of exposure, do you think the person was still infectious (this is typically within the first 14 days of their illness)?**  
 Yes  
 No  
 I don't know  
 Prefer not to answer

**Exposure #3** **Please identify where the exposure occurred: (check all that apply)**

- Household member
- Non-household close contact (friend/other family)
- Health care setting (e.g. Dr. office, physiotherapis/chiropractor office, hospital)
- School, college, university
- Personal service provider (e.g. hair salon/barber, esthetician)
- Workplace
- Travel, where:
- Other, specify:
- Prefer not to answer

**When did this exposure occur?**  
 Month:  Year:

**At the time of exposure, do you think the person was still infectious (this is typically within the first 14 days of their illness)?**  
 Yes  
 No  
 I don't know  
 Prefer not to answer

**Are you (your child) currently in isolation?**  Yes  
 No  
[reset](#)

**When you (your child) were in indoor public spaces (e.g. shopping, dining) how frequently did you (your child):**

|                                                                                                          | Never                 | Rarely                | Some of the time      | Most of the time      | Every time            |
|----------------------------------------------------------------------------------------------------------|-----------------------|-----------------------|-----------------------|-----------------------|-----------------------|
| <b>Wash your hands or use hand sanitizer</b><br><small>* must provide value</small>                      | <input type="radio"/> | <input type="radio"/> | <input type="radio"/> | <input type="radio"/> | <input type="radio"/> |
| <b>Maintain a distance of 2 meters from members of the public</b><br><small>* must provide value</small> | <input type="radio"/> | <input type="radio"/> | <input type="radio"/> | <input type="radio"/> | <input type="radio"/> |
| <b>Wear a mask or other face covering</b><br><small>* must provide value</small>                         | <input type="radio"/> | <input type="radio"/> | <input type="radio"/> | <input type="radio"/> | <input type="radio"/> |

**Baseline Survey**

**HOUSEHOLD DETAILS**

Other than yourself (your child), how many people live in your home since January 2020? H   
 If you (your child) are a student currently living in student residence, please complete the following table for each roommate you have.  
 \* must provide value

Please complete the following table(s) for each household member:

|                                                                                                          |                                                                                                                                                                                                                                                                                                                                                                                                                                                                                                                                                                                                                                                                                                                                                                                                                                                                                                                                                                        |
|----------------------------------------------------------------------------------------------------------|------------------------------------------------------------------------------------------------------------------------------------------------------------------------------------------------------------------------------------------------------------------------------------------------------------------------------------------------------------------------------------------------------------------------------------------------------------------------------------------------------------------------------------------------------------------------------------------------------------------------------------------------------------------------------------------------------------------------------------------------------------------------------------------------------------------------------------------------------------------------------------------------------------------------------------------------------------------------|
| <b>Household member #1</b>                                                                               |                                                                                                                                                                                                                                                                                                                                                                                                                                                                                                                                                                                                                                                                                                                                                                                                                                                                                                                                                                        |
| <b>Age in years</b><br>(enter as "0" for children less than 1yr old)                                     | <input style="width: 100%;" type="text"/>                                                                                                                                                                                                                                                                                                                                                                                                                                                                                                                                                                                                                                                                                                                                                                                                                                                                                                                              |
| <b>In the last 6 months, did this household member leave the home to go to:</b><br>(tick all that apply) | <input type="checkbox"/> Work (choose all jobs in the last 6 months) <ul style="list-style-type: none"> <li><input type="checkbox"/> Healthcare worker</li> <li><input type="checkbox"/> Essential worker (e.g. postal, grocery, delivery)</li> <li><input type="checkbox"/> Personal service provider (e.g. hairdresser/barber, esthetician)</li> <li><input type="checkbox"/> Teacher, Principal, School counsellor etc.</li> <li><input type="checkbox"/> Other, specify:</li> </ul> <input type="checkbox"/> School (choose level of schooling) <ul style="list-style-type: none"> <li><input type="radio"/> Preschool</li> <li><input type="radio"/> Elementary/Primary</li> <li><input type="radio"/> Secondary/High school</li> <li><input type="radio"/> Post secondary (college, university or technical institute)</li> </ul> <input type="checkbox"/> Daycare<br><input type="checkbox"/> Other, specify:<br><input type="checkbox"/> No, none of the above |

reset

|                                                                                                          |                                                                                                                                                                                                                                                                       |
|----------------------------------------------------------------------------------------------------------|-----------------------------------------------------------------------------------------------------------------------------------------------------------------------------------------------------------------------------------------------------------------------|
| <b>Household member #2</b>                                                                               |                                                                                                                                                                                                                                                                       |
| <b>Age in years</b><br>(enter as "0" for children less than 1yr old)                                     | <input style="width: 100%;" type="text"/>                                                                                                                                                                                                                             |
| <b>In the last 6 months, did this household member leave the home to go to:</b><br>(tick all that apply) | <input type="checkbox"/> Work (choose all jobs in the last 6 months)<br><input type="checkbox"/> School (choose level of schooling)<br><input type="checkbox"/> Daycare<br><input type="checkbox"/> Other, specify:<br><input type="checkbox"/> No, none of the above |
| •<br>•<br>•                                                                                              |                                                                                                                                                                                                                                                                       |

|                                                                                                          |                                                                                                                                                                                                                                                                       |
|----------------------------------------------------------------------------------------------------------|-----------------------------------------------------------------------------------------------------------------------------------------------------------------------------------------------------------------------------------------------------------------------|
| <b>Household member #9</b>                                                                               |                                                                                                                                                                                                                                                                       |
| <b>Age in years</b><br>(enter as "0" for children less than 1yr old)                                     | <input style="width: 100%;" type="text"/>                                                                                                                                                                                                                             |
| <b>In the last 6 months, did this household member leave the home to go to:</b><br>(tick all that apply) | <input type="checkbox"/> Work (choose all jobs in the last 6 months)<br><input type="checkbox"/> School (choose level of schooling)<br><input type="checkbox"/> Daycare<br><input type="checkbox"/> Other, specify:<br><input type="checkbox"/> No, none of the above |

**Baseline Survey**

Since January 2020, have you (your child) been sick? (H)  Yes  
 No  
 Prefer not to answer  
\* must provide value reset

How many times have you (your child) been sick? (H)   
\* must provide value

| Illness #1                                                                                                                                                                                | Illness #2                                                                                                                                                                                | Illness #3                                                                                                                                                                                |
|-------------------------------------------------------------------------------------------------------------------------------------------------------------------------------------------|-------------------------------------------------------------------------------------------------------------------------------------------------------------------------------------------|-------------------------------------------------------------------------------------------------------------------------------------------------------------------------------------------|
| <b>When was this illness? (Month/year)</b>                                                                                                                                                |                                                                                                                                                                                           |                                                                                                                                                                                           |
| <input style="width: 40px; height: 20px; border: 1px solid #ccc;" type="text"/> <input style="width: 15px; height: 15px; border: 1px solid #ccc; background-color: #eee;" type="button"/> | <input style="width: 40px; height: 20px; border: 1px solid #ccc;" type="text"/> <input style="width: 15px; height: 15px; border: 1px solid #ccc; background-color: #eee;" type="button"/> | <input style="width: 40px; height: 20px; border: 1px solid #ccc;" type="text"/> <input style="width: 15px; height: 15px; border: 1px solid #ccc; background-color: #eee;" type="button"/> |

**Which of the following symptoms did you (your child) experience during this illness? (tick all that apply)**

|                                                                                                                                                                                                                                                                                                                                                                                                                                                                       |                                                                                                                                                                                                                                                                                                                                                                                                                                                                       |                                                                                                                                                                                                                                                                                                                                                                                                                                                                       |
|-----------------------------------------------------------------------------------------------------------------------------------------------------------------------------------------------------------------------------------------------------------------------------------------------------------------------------------------------------------------------------------------------------------------------------------------------------------------------|-----------------------------------------------------------------------------------------------------------------------------------------------------------------------------------------------------------------------------------------------------------------------------------------------------------------------------------------------------------------------------------------------------------------------------------------------------------------------|-----------------------------------------------------------------------------------------------------------------------------------------------------------------------------------------------------------------------------------------------------------------------------------------------------------------------------------------------------------------------------------------------------------------------------------------------------------------------|
| <input type="checkbox"/> Fever >38 C<br><input type="checkbox"/> Chills<br><input type="checkbox"/> Cough<br><input type="checkbox"/> Shortness of breath<br><input type="checkbox"/> Alteration to taste<br><input type="checkbox"/> Alteration to smell<br><input type="checkbox"/> Nausea<br><input type="checkbox"/> Vomiting<br><input type="checkbox"/> Diarrhea<br><input type="checkbox"/> None of the above<br><input type="checkbox"/> Prefer not to answer | <input type="checkbox"/> Fever >38?C<br><input type="checkbox"/> Chills<br><input type="checkbox"/> Cough<br><input type="checkbox"/> Shortness of breath<br><input type="checkbox"/> Alteration to taste<br><input type="checkbox"/> Alteration to smell<br><input type="checkbox"/> Nausea<br><input type="checkbox"/> Vomiting<br><input type="checkbox"/> Diarrhea<br><input type="checkbox"/> None of the above<br><input type="checkbox"/> Prefer not to answer | <input type="checkbox"/> Fever >38?C<br><input type="checkbox"/> Chills<br><input type="checkbox"/> Cough<br><input type="checkbox"/> Shortness of breath<br><input type="checkbox"/> Alteration to taste<br><input type="checkbox"/> Alteration to smell<br><input type="checkbox"/> Nausea<br><input type="checkbox"/> Vomiting<br><input type="checkbox"/> Diarrhea<br><input type="checkbox"/> None of the above<br><input type="checkbox"/> Prefer not to answer |
|-----------------------------------------------------------------------------------------------------------------------------------------------------------------------------------------------------------------------------------------------------------------------------------------------------------------------------------------------------------------------------------------------------------------------------------------------------------------------|-----------------------------------------------------------------------------------------------------------------------------------------------------------------------------------------------------------------------------------------------------------------------------------------------------------------------------------------------------------------------------------------------------------------------------------------------------------------------|-----------------------------------------------------------------------------------------------------------------------------------------------------------------------------------------------------------------------------------------------------------------------------------------------------------------------------------------------------------------------------------------------------------------------------------------------------------------------|

**How long did this illness last?**

|                                                                                                                                                                                         |                                                                                                                                                                                         |                                                                                                                                                                                         |
|-----------------------------------------------------------------------------------------------------------------------------------------------------------------------------------------|-----------------------------------------------------------------------------------------------------------------------------------------------------------------------------------------|-----------------------------------------------------------------------------------------------------------------------------------------------------------------------------------------|
| <input style="width: 100px; height: 20px;" type="text"/><br><input type="radio"/> Days<br><input type="radio"/> Weeks<br><small style="text-align: right;"><small>reset</small></small> | <input style="width: 100px; height: 20px;" type="text"/><br><input type="radio"/> Days<br><input type="radio"/> Weeks<br><small style="text-align: right;"><small>reset</small></small> | <input style="width: 100px; height: 20px;" type="text"/><br><input type="radio"/> Days<br><input type="radio"/> Weeks<br><small style="text-align: right;"><small>reset</small></small> |
|-----------------------------------------------------------------------------------------------------------------------------------------------------------------------------------------|-----------------------------------------------------------------------------------------------------------------------------------------------------------------------------------------|-----------------------------------------------------------------------------------------------------------------------------------------------------------------------------------------|

**Did this illness cause you (your child) to miss work or school/daycare?**

|                                                                                                                         |                                                                                                                         |                                                                                                                         |
|-------------------------------------------------------------------------------------------------------------------------|-------------------------------------------------------------------------------------------------------------------------|-------------------------------------------------------------------------------------------------------------------------|
| <input type="radio"/> Yes<br><input type="radio"/> No<br><small style="text-align: right;"><small>reset</small></small> | <input type="radio"/> Yes<br><input type="radio"/> No<br><small style="text-align: right;"><small>reset</small></small> | <input type="radio"/> Yes<br><input type="radio"/> No<br><small style="text-align: right;"><small>reset</small></small> |
|-------------------------------------------------------------------------------------------------------------------------|-------------------------------------------------------------------------------------------------------------------------|-------------------------------------------------------------------------------------------------------------------------|

**Did you (your child) need to seek medical attention?**

|                                                                                                                         |                                                                                                                         |                                                                                                                         |
|-------------------------------------------------------------------------------------------------------------------------|-------------------------------------------------------------------------------------------------------------------------|-------------------------------------------------------------------------------------------------------------------------|
| <input type="radio"/> Yes<br><input type="radio"/> No<br><small style="text-align: right;"><small>reset</small></small> | <input type="radio"/> Yes<br><input type="radio"/> No<br><small style="text-align: right;"><small>reset</small></small> | <input type="radio"/> Yes<br><input type="radio"/> No<br><small style="text-align: right;"><small>reset</small></small> |
|-------------------------------------------------------------------------------------------------------------------------|-------------------------------------------------------------------------------------------------------------------------|-------------------------------------------------------------------------------------------------------------------------|

You mentioned above that you sought medical attention, did you (your child) require hospitalization? (H)  Yes  
 No  
 Prefer not to answer  
\* must provide value reset

Did you (your child) require admission to ICU?  Yes  
 No  
 Prefer not to answer  
\* must provide value reset

Are you (your child) still sick? (H)  Yes  
 No  
 Prefer not to answer  
\* must provide value reset

Have you (your child) ever been tested for COVID-19? (H)  Yes  
 No  
 Prefer not to answer  
\* must provide value reset

When were you (your child) last tested? mo:  yr:   
\* must provide value

What was the result? (H)  Positive  
 Negative  
 Indeterminate/Inconclusive  
 I don't know  
 Prefer not to answer  
\* must provide value reset

**Baseline Survey**

**Have you (your child) been vaccinated against COVID-19?**  Yes  No reset  
\* must provide value

**How many doses of the COVID-19 vaccine have you (your child) received so far?**  One dose  Two dose  More than two dose  
\* must provide value

**Vaccination date of first dose:**

| Day | Month | Year |
|-----|-------|------|
| ▼   | ▼     | ▼    |

\* must provide value

**Which vaccine did you (your child) receive?**

- Pfizer and BioNTech mRNA vaccine
- Moderna mRNA vaccine
- AstraZeneca Oxford vaccine
- Janssen (Johnson & Johnson) vaccine
- Medicago vaccine
- Novavax vaccine
- Sanofi/GSK vaccine
- Other:
- Don't know

**Vaccination date of second dose:**

| Day | Month | Year |
|-----|-------|------|
| ▼   | ▼     | ▼    |

\* must provide value

**Which vaccine did you (your child) receive?**

- Pfizer and BioNTech mRNA vaccine
- Moderna mRNA vaccine
- AstraZeneca Oxford vaccine
- Janssen (Johnson & Johnson) vaccine
- Medicago vaccine
- Novavax vaccine
- Sanofi/GSK vaccine
- Other:
- Don't know

**Vaccination date of additional dose:**

| Day | Month | Year |
|-----|-------|------|
| ▼   | ▼     | ▼    |

\* must provide value

**Which vaccine did you (your child) receive?**

- Pfizer and BioNTech mRNA vaccine
- Moderna mRNA vaccine
- AstraZeneca Oxford vaccine
- Janssen (Johnson & Johnson) vaccine
- Medicago vaccine
- Novavax vaccine
- Sanofi/GSK vaccine
- Other:
- Don't know

**Next we'd like to ask you some questions about how you feel about vaccines, including a future COVID-19 vaccine: For parents of children < 14 years old, please answer the following questions for yourself:**

|                                                                                                                                 | Very unlikely         | Unlikely              | Neutral               | Somewhat likely       | Very likely           |
|---------------------------------------------------------------------------------------------------------------------------------|-----------------------|-----------------------|-----------------------|-----------------------|-----------------------|
| <b>If a COVID-19 vaccine were to become available to the public, and recommended for you, how likely are you to receive it?</b> | <input type="radio"/> | <input type="radio"/> | <input type="radio"/> | <input type="radio"/> | <input type="radio"/> |

\* must provide value

**Baseline Survey**

Do you receive all recommended vaccines when offered to you by health care professionals?  Yes  
 No  
 I don't know reset

---

Thinking back to before the beginning of the pandemic (December 2019), how much did you value vaccines?  No value  
 Very little value  
 Neutral  
 A little value  
 Valued a lot reset

---

Today, how much do you value vaccines?  No value  
 Very little value  
 Neutral  
 A little value  
 Valued a lot reset

---

Have you received the influenza vaccine in the past 5 years?  Never  
 1-2 times  
 3-4 times  
 Every year  
 I don't know reset

Variable: kab\_next\_fluvaccine

Do you intend to or did you receive the influenza vaccine in the fall of 2020?  Yes  
 No  
 I don't know reset

@HIDDEN

[Add Field](#) [Add Matrix of Fields](#) [Import from Field Bank](#)

---

Variable: kab\_last\_fluvaccine

Did you receive the influenza vaccine in the fall of [last year]?  Yes  
 No  
 I don't know reset

[Add Field](#) [Add Matrix of Fields](#) [Import from Field Bank](#)

---

Variable: kab\_current\_fluvaccine

Have you received the influenza vaccine in the fall of [current year]?  Yes  
 No  
 I don't know reset

[Add Field](#) [Add Matrix of Fields](#) [Import from Field Bank](#)

---

Variable: kab\_intend\_fluvaccine *Branching logic: [kab\_current\_fluvaccine] = 'N'*

Do you intend to receive the influenza vaccine in [current year]?  Yes  
 No  
 I don't know reset

**Baseline Survey**

Please indicate how much you agree or disagree with the following statements:

|                                                                                                   |                                                                                                                                                                            | Strongly disagree     | Somewhat disagree     | Neutral               | Somewhat agree        | Strongly agree        |
|---------------------------------------------------------------------------------------------------|----------------------------------------------------------------------------------------------------------------------------------------------------------------------------|-----------------------|-----------------------|-----------------------|-----------------------|-----------------------|
| Childhood vaccines are important for a child's health                                             | <br>     | <input type="radio"/> | <input type="radio"/> | <input type="radio"/> | <input type="radio"/> | <input type="radio"/> |
| Getting vaccines is a good way to protect children from disease                                   | <br>     | <input type="radio"/> | <input type="radio"/> | <input type="radio"/> | <input type="radio"/> | <input type="radio"/> |
| Childhood vaccines are effective                                                                  | <br>     | <input type="radio"/> | <input type="radio"/> | <input type="radio"/> | <input type="radio"/> | <input type="radio"/> |
| Having a child vaccinated is important for the health of others in my community                   | <br>     | <input type="radio"/> | <input type="radio"/> | <input type="radio"/> | <input type="radio"/> | <input type="radio"/> |
| All childhood vaccines offered by the BC immunization program in my community are beneficial      | <br>     | <input type="radio"/> | <input type="radio"/> | <input type="radio"/> | <input type="radio"/> | <input type="radio"/> |
| The information I receive about vaccines from the vaccination program is reliable and trustworthy | <br>     | <input type="radio"/> | <input type="radio"/> | <input type="radio"/> | <input type="radio"/> | <input type="radio"/> |
| Generally, I do what my doctor or health care provider recommends about vaccines                  | <br>     | <input type="radio"/> | <input type="radio"/> | <input type="radio"/> | <input type="radio"/> | <input type="radio"/> |
| New vaccines carry more risks than older vaccines                                                 | <br>  | <input type="radio"/> | <input type="radio"/> | <input type="radio"/> | <input type="radio"/> | <input type="radio"/> |
| I am concerned about potential serious adverse effects of vaccines                                | <br> | <input type="radio"/> | <input type="radio"/> | <input type="radio"/> | <input type="radio"/> | <input type="radio"/> |
| Children do not need vaccines for diseases that are not common anymore                            | <br> | <input type="radio"/> | <input type="radio"/> | <input type="radio"/> | <input type="radio"/> | <input type="radio"/> |
| The risk associated with diseases is larger than the risk associated with vaccinations            | <br> | <input type="radio"/> | <input type="radio"/> | <input type="radio"/> | <input type="radio"/> | <input type="radio"/> |



 **Baseline Survey**

Assuming that a safe and effective COVID-19 vaccine was available and recommended, please indicate how much you agree or disagree with the following statements:

|                                                                                                                  |                                                                                   | Strongly disagree     | Disagree              | Neutral               | Agree                 | Strongly agree        |
|------------------------------------------------------------------------------------------------------------------|-----------------------------------------------------------------------------------|-----------------------|-----------------------|-----------------------|-----------------------|-----------------------|
| A COVID-19 vaccine would be beneficial<br><small>* must provide value</small>                                    |  | <input type="radio"/> | <input type="radio"/> | <input type="radio"/> | <input type="radio"/> | <input type="radio"/> |
| A COVID-19 vaccine would be beneficial for children<br><small>* must provide value</small>                       |  | <input type="radio"/> | <input type="radio"/> | <input type="radio"/> | <input type="radio"/> | <input type="radio"/> |
| A COVID-19 vaccine would be beneficial for individuals 60-years and older<br><small>* must provide value</small> |  | <input type="radio"/> | <input type="radio"/> | <input type="radio"/> | <input type="radio"/> | <input type="radio"/> |
| COVID-19 is a serious illness<br><small>* must provide value</small>                                             |  | <input type="radio"/> | <input type="radio"/> | <input type="radio"/> | <input type="radio"/> | <input type="radio"/> |
| A COVID-19 vaccine would be beneficial for the health of my community<br><small>* must provide value</small>     |  | <input type="radio"/> | <input type="radio"/> | <input type="radio"/> | <input type="radio"/> | <input type="radio"/> |
| A COVID-19 vaccine would be safe<br><small>* must provide value</small>                                          |  | <input type="radio"/> | <input type="radio"/> | <input type="radio"/> | <input type="radio"/> | <input type="radio"/> |
| A COVID-19 vaccine would be effective in preventing COVID-19<br><small>* must provide value</small>              |  | <input type="radio"/> | <input type="radio"/> | <input type="radio"/> | <input type="radio"/> | <input type="radio"/> |
| A COVID-19 vaccine should be mandatory<br><small>* must provide value</small>                                    |  | <input type="radio"/> | <input type="radio"/> | <input type="radio"/> | <input type="radio"/> | <input type="radio"/> |

Please answer the following questions, with the assumption that a safe and effective COVID-19 vaccine is available and recommended.

|                                                                                            |                                                                                     | Strongly disagree     | Disagree              | Neutral               | Agree                 | Strongly agree        |
|--------------------------------------------------------------------------------------------|-------------------------------------------------------------------------------------|-----------------------|-----------------------|-----------------------|-----------------------|-----------------------|
| Most people who are important to me would think that I should receive the COVID-19 vaccine |  | <input type="radio"/> | <input type="radio"/> | <input type="radio"/> | <input type="radio"/> | <input type="radio"/> |
| People who are important to me would expect me to receive the COVID-19 vaccine             |  | <input type="radio"/> | <input type="radio"/> | <input type="radio"/> | <input type="radio"/> | <input type="radio"/> |
| I would feel under social pressure to receive a COVID-19 vaccine                           |  | <input type="radio"/> | <input type="radio"/> | <input type="radio"/> | <input type="radio"/> | <input type="radio"/> |
| Everyone I know would get the COVID-19 vaccine                                             |  | <input type="radio"/> | <input type="radio"/> | <input type="radio"/> | <input type="radio"/> | <input type="radio"/> |
| My family physician's (or other primary Health Care Provider's) opinion is important to me |  | <input type="radio"/> | <input type="radio"/> | <input type="radio"/> | <input type="radio"/> | <input type="radio"/> |
| What the BC Public Health Officer recommends is important to follow                        |  | <input type="radio"/> | <input type="radio"/> | <input type="radio"/> | <input type="radio"/> | <input type="radio"/> |
| What my coworkers think is important to me                                                 |  | <input type="radio"/> | <input type="radio"/> | <input type="radio"/> | <input type="radio"/> | <input type="radio"/> |
| What my employer/work institution thinks is important to me                                |  | <input type="radio"/> | <input type="radio"/> | <input type="radio"/> | <input type="radio"/> | <input type="radio"/> |
| What my school/children's school thinks is important to me                                 |  | <input type="radio"/> | <input type="radio"/> | <input type="radio"/> | <input type="radio"/> | <input type="radio"/> |
| What my friends think is important to me                                                   |  | <input type="radio"/> | <input type="radio"/> | <input type="radio"/> | <input type="radio"/> | <input type="radio"/> |
| What my family thinks is important to me                                                   |  | <input type="radio"/> | <input type="radio"/> | <input type="radio"/> | <input type="radio"/> | <input type="radio"/> |

**Baseline Survey**

Please answer the following questions, with the assumption that a safe and effective COVID-19 vaccine is available and recommended.

|                                                                                                                                                                                          |                                                                                                                                                                            | Strongly disapprove   | Disapprove            | Neutral               | Approve               | Strongly approve      |
|------------------------------------------------------------------------------------------------------------------------------------------------------------------------------------------|----------------------------------------------------------------------------------------------------------------------------------------------------------------------------|-----------------------|-----------------------|-----------------------|-----------------------|-----------------------|
| My family physician (or other primary Health Care Provider) would [approve/disapprove] of me receiving a COVID-19 vaccine                                                                | <br>     | <input type="radio"/> | <input type="radio"/> | <input type="radio"/> | <input type="radio"/> | <input type="radio"/> |
| The BC Public Health Officer would [approve/disapprove] of me receiving the COVID-19 vaccine                                                                                             | <br>     | <input type="radio"/> | <input type="radio"/> | <input type="radio"/> | <input type="radio"/> | <input type="radio"/> |
| My coworkers would [approve/disapprove] of me receiving the COVID-19 vaccine                                                                                                             | <br>     | <input type="radio"/> | <input type="radio"/> | <input type="radio"/> | <input type="radio"/> | <input type="radio"/> |
| My employer/work institution would [approve/disapprove] of me receiving the COVID-19 vaccine                                                                                             | <br>     | <input type="radio"/> | <input type="radio"/> | <input type="radio"/> | <input type="radio"/> | <input type="radio"/> |
| The educational institution (elementary/high school/college/university) that I or my children attend/are associated with would [approve/disapprove] of me receiving the COVID-19 vaccine | <br>     | <input type="radio"/> | <input type="radio"/> | <input type="radio"/> | <input type="radio"/> | <input type="radio"/> |
| My friends would [approve/disapprove] of me receiving the COVID-19 vaccine                                                                                                               | <br> | <input type="radio"/> | <input type="radio"/> | <input type="radio"/> | <input type="radio"/> | <input type="radio"/> |
| My family would [approve/disapprove] of me receiving the COVID-19 vaccine                                                                                                                | <br> | <input type="radio"/> | <input type="radio"/> | <input type="radio"/> | <input type="radio"/> | <input type="radio"/> |

For the next 3 questions: If a COVID-19 vaccine was publicly funded and available, like the flu shot, ...

|                                                                             |                                                                                                                                                                            | Strongly disagree     | Disagree              | Neutral               | Agree                 | Strongly agree        |
|-----------------------------------------------------------------------------|----------------------------------------------------------------------------------------------------------------------------------------------------------------------------|-----------------------|-----------------------|-----------------------|-----------------------|-----------------------|
| ...It would be difficult to receive the COVID-19 vaccine                    | <br> | <input type="radio"/> | <input type="radio"/> | <input type="radio"/> | <input type="radio"/> | <input type="radio"/> |
| ... I could easily receive a COVID-19 vaccine if I wanted to                | <br> | <input type="radio"/> | <input type="radio"/> | <input type="radio"/> | <input type="radio"/> | <input type="radio"/> |
| ... It would be completely up to me whether I received the COVID-19 vaccine | <br> | <input type="radio"/> | <input type="radio"/> | <input type="radio"/> | <input type="radio"/> | <input type="radio"/> |

How much control do you feel you would have over whether you receive a COVID-19 vaccine?

  


- Very little control
- Not much control
- Neutral
- Some control
- A lot of control

Please make sure you click the "submit" button to complete your survey. Your survey responses will not be registered if you do not click "submit".

## Baseline Survey-household

Record ID:

### BACKGROUND INFORMATION

**PARENTS:** Please answer the questions in relation to your child

What is your child's age?

- Years  
 Months

Your child must be under 25 years old to participate in this study. If your child is 25 years old or older, please contact the SPRING study team.

If your child is under 2 years of age, please enter the age in months.

What sex was your child assigned at birth?

\* must provide value

- Male  
 Female  
 Intersex  
 Prefer to self-describe as:   
 Prefer not to answer

What best describes your child's gender:

\* must provide value

- Man/boy  
 Woman/girl  
 Non-binary, GenderQueer, Agender or similar identity  
 Two-spirit  
 Prefer to self-describe as:   
 Prefer not to answer

What are the first three digits of your child's postal code?

(e.g. V5H) \* must provide value

What best describes your child's ethnicity?  
*(tick all that apply)*

\* must provide value

- Indigenous (First Nations, Metis, Inuk/Inuit)  
 White  
 Chinese  
 South Asian (East Indian, Pakistani, Sri Lankan, etc)  
 Black (African, African-American)  
 Filipino  
 Latin, Central and South American  
 Southeast Asian (Vietnamese, Cambodian, Malaysian, Laotian, etc.)  
 Arabic  
 West Asian (Iranian, Afghan, etc.)  
 Korean  
 Japanese  
 Alaskan Native  
 Native Hawaiian or other Pacific Islander  
 Other, specify:   
 Prefer not to answer

Does your child have any current medical conditions?

\* must provide value

- Yes  
 No

reset

Please list your child's current medical condition(s):

Is your child currently taking any prescription medication?

\* must provide value

- Yes  
 No  
 Prefer not to answer

reset

Please list the name of the prescription medication(s):

**Baseline Survey-household**

Since January 2020, did your child leave the home to go to:  
 \* must provide value

- Work (choose all that apply)
  - Healthcare worker
  - Essential worker (e.g. postal, grocery, delivery)
  - Personal service provider (e.g. hairdresser/barber, esthetician)
  - Teacher, Principal, School counselor etc.
  - Other, specify:
- School (choose level of schooling)
  - Preschool
  - Elementary/Primary
  - Secondary/High school
  - Post secondary (college, university or technical institute)
- Daycare
- Other, specify:
- None of the above
- Prefer not to answer

**In the last 6 months, on average, how many times per week does your child use the following transportation?**

|                                                                                                  | never                 | less than 1/week      | 1-2 times/week        | 3-4 times/week        | 5-6 times/week        | daily                 |
|--------------------------------------------------------------------------------------------------|-----------------------|-----------------------|-----------------------|-----------------------|-----------------------|-----------------------|
| <b>Public transportation</b><br>* must provide value                                             | <input type="radio"/> | <input type="radio"/> | <input type="radio"/> | <input type="radio"/> | <input type="radio"/> | <input type="radio"/> |
| <b>Another's private vehicle (such as taxi, car pooling, ride share)</b><br>* must provide value | <input type="radio"/> | <input type="radio"/> | <input type="radio"/> | <input type="radio"/> | <input type="radio"/> | <input type="radio"/> |

[reset](#)

**COVID-19 EXPOSURE INFORMATION**

Since January 2020, has your child travelled outside of BC?  
 (tick all that apply)  
 \* must provide value

- Yes, within Canada
- Yes, outside Canada
- No
- Prefer not to answer

Which province did your child travel to?  
 \* must provide value

- Alberta
- Manitoba
- New Brunswick
- Newfoundland and Labrador
- Northwest Territories
- Nova Scotia
- Nunavut
- Ontario
- Prince Edward Island
- Quebec
- Saskatchewan
- Yukon
- Prefer not to answer

How many total weeks did your child spend outside of BC but within Canada?  
 \* must provide value

When did your child last return to BC from within Canada?  
 \* must provide value

   Today D-M-Y

What country/countries did your child travel to?  
 \* must provide value

How many total weeks did your child spend outside of Canada?  
 \* must provide value

When did your child last return to BC from outside Canada?  
 \* must provide value

   Today D-M-Y

**Baseline Survey-household**

Has your child ever had any exposure to a person who tested positive for COVID-19?

- Yes
- No
- I don't know
- Prefer not to answer

reset

How many people has your child been exposed to?

\* must provide value

**Exposure #1** Please identify where the exposure occurred: (check all that apply)

- Household member
- Non-household close contact (friend/other family)
- Health care setting (e.g. Dr. office, physiotherapis/chiropractor office, hospital)
- School, college, university
- Personal service provider (e.g. hair salon/barber, esthetician)
- Workplace
- Travel, where:
- Other, specify:
- Prefer not to answer

When did this exposure occur?

Month:  Year:

At the time of exposure, do you think the person was still infectious (this is typically within the first 14 days of their illness)?

- Yes
- No
- I don't know
- Prefer not to answer

**Exposure #2** Please identify where the exposure occurred: (check all that apply)

- Household member
- Non-household close contact (friend/other family)
- Health care setting (e.g. Dr. office, physiotherapis/chiropractor office, hospital)
- School, college, university
- Personal service provider (e.g. hair salon/barber, esthetician)
- Workplace
- Travel, where:
- Other, specify:
- Prefer not to answer

When did this exposure occur?

Month:  Year:

At the time of exposure, do you think the person was still infectious (this is typically within the first 14 days of their illness)?

- Yes
- No
- I don't know
- Prefer not to answer

**Exposure #3** Please identify where the exposure occurred: (check all that apply)

- Household member
- Non-household close contact (friend/other family)
- Health care setting (e.g. Dr. office, physiotherapis/chiropractor office, hospital)
- School, college, university
- Personal service provider (e.g. hair salon/barber, esthetician)
- Workplace
- Travel, where:
- Other, specify:
- Prefer not to answer

When did this exposure occur?

Month:  Year:

At the time of exposure, do you think the person was still infectious (this is typically within the first 14 days of their illness)?

- Yes
- No
- I don't know
- Prefer not to answer

Is your child currently in isolation?

- Yes
- No

reset

When your child was in indoor public spaces (e.g. shopping, dining) how frequently did your child:

|                                                                                                   | Never                 | Rarely                | Some of the time      | Most of the time      | Every time            |
|---------------------------------------------------------------------------------------------------|-----------------------|-----------------------|-----------------------|-----------------------|-----------------------|
| Wash hands or use hand sanitizer<br><small>* must provide value</small>                           | <input type="radio"/> | <input type="radio"/> | <input type="radio"/> | <input type="radio"/> | <input type="radio"/> |
| Maintain a distance of 2 meters from members of the public<br><small>* must provide value</small> | <input type="radio"/> | <input type="radio"/> | <input type="radio"/> | <input type="radio"/> | <input type="radio"/> |
| Wear a mask or other face covering<br><small>* must provide value</small>                         | <input type="radio"/> | <input type="radio"/> | <input type="radio"/> | <input type="radio"/> | <input type="radio"/> |

**Baseline Survey-household**

**HOUSEHOLD DETAILS**

Other than your child, how many people live in your home since January 2020?

\* must provide value

Please complete the following table(s) for each household member:

**Household member #1**

|                                                                                                          |                                                                                                                                                                                                                                                                                                                                                                                                                                                                                                                                                                                                                                                                                                                                                                                                                                                                                                                                                                        |
|----------------------------------------------------------------------------------------------------------|------------------------------------------------------------------------------------------------------------------------------------------------------------------------------------------------------------------------------------------------------------------------------------------------------------------------------------------------------------------------------------------------------------------------------------------------------------------------------------------------------------------------------------------------------------------------------------------------------------------------------------------------------------------------------------------------------------------------------------------------------------------------------------------------------------------------------------------------------------------------------------------------------------------------------------------------------------------------|
| <b>Age in years</b><br>(enter as "0" for children less than 1yr old)                                     | <input type="text"/>                                                                                                                                                                                                                                                                                                                                                                                                                                                                                                                                                                                                                                                                                                                                                                                                                                                                                                                                                   |
| <b>In the last 6 months, did this household member leave the home to go to:</b><br>(tick all that apply) | <input type="checkbox"/> Work (choose all jobs in the last 6 months) <ul style="list-style-type: none"> <li><input type="checkbox"/> Healthcare worker</li> <li><input type="checkbox"/> Essential worker (e.g. postal, grocery, delivery)</li> <li><input type="checkbox"/> Personal service provider (e.g. hairdresser/barber, esthetician)</li> <li><input type="checkbox"/> Teacher, Principal, School counsellor etc.</li> <li><input type="checkbox"/> Other, specify:</li> </ul> <input type="checkbox"/> School (choose level of schooling) <ul style="list-style-type: none"> <li><input type="radio"/> Preschool</li> <li><input type="radio"/> Elementary/Primary</li> <li><input type="radio"/> Secondary/High school</li> <li><input type="radio"/> Post secondary (college, university or technical institute)</li> </ul> <input type="checkbox"/> Daycare<br><input type="checkbox"/> Other, specify:<br><input type="checkbox"/> No, none of the above |

reset

**Household member #2**

|                                                                                                          |                                                                                                                                                                                                                                                                 |
|----------------------------------------------------------------------------------------------------------|-----------------------------------------------------------------------------------------------------------------------------------------------------------------------------------------------------------------------------------------------------------------|
| <b>Age in years</b><br>(enter as "0" for children less than 1yr old)                                     | <input type="text"/>                                                                                                                                                                                                                                            |
| <b>In the last 6 months, did this household member leave the home to go to:</b><br>(tick all that apply) | <input type="checkbox"/> Work (choose all jobs in the last 6 months) <input type="checkbox"/> School (choose level of schooling) <input type="checkbox"/> Daycare<br><input type="checkbox"/> Other, specify:<br><input type="checkbox"/> No, none of the above |

**Household member #9**

|                                                                                                          |                                                                                                                                                                                                                                                                 |
|----------------------------------------------------------------------------------------------------------|-----------------------------------------------------------------------------------------------------------------------------------------------------------------------------------------------------------------------------------------------------------------|
| <b>Age in years</b><br>(enter as "0" for children less than 1yr old)                                     | <input type="text"/>                                                                                                                                                                                                                                            |
| <b>In the last 6 months, did this household member leave the home to go to:</b><br>(tick all that apply) | <input type="checkbox"/> Work (choose all jobs in the last 6 months) <input type="checkbox"/> School (choose level of schooling) <input type="checkbox"/> Daycare<br><input type="checkbox"/> Other, specify:<br><input type="checkbox"/> No, none of the above |

**Baseline Survey-household**

|                                                                                                                                                                                                                                                                                                                                                                                                                                                                       |                                                                                                                                                                                                                                                                                                                                                                                                                                                                       |                                                                                                                                                                                                                                                                                                                                                                                                                                                                       |                       |
|-----------------------------------------------------------------------------------------------------------------------------------------------------------------------------------------------------------------------------------------------------------------------------------------------------------------------------------------------------------------------------------------------------------------------------------------------------------------------|-----------------------------------------------------------------------------------------------------------------------------------------------------------------------------------------------------------------------------------------------------------------------------------------------------------------------------------------------------------------------------------------------------------------------------------------------------------------------|-----------------------------------------------------------------------------------------------------------------------------------------------------------------------------------------------------------------------------------------------------------------------------------------------------------------------------------------------------------------------------------------------------------------------------------------------------------------------|-----------------------|
| <p><b>Since January 2020, has your child been sick?</b></p> <p><small>* must provide value</small></p>                                                                                                                                                                                                                                                                                                                                                                |                                                                                                                                                                                                                                                                                                                                                                                                                                                                       | <input type="radio"/> Yes<br><input type="radio"/> No<br><input type="radio"/> Prefer not to answer                                                                                                                                                                                                                                                                                                                                                                   | <a href="#">reset</a> |
| <p><b>How many times has your child been sick?</b></p> <p><small>* must provide value</small></p>                                                                                                                                                                                                                                                                                                                                                                     |                                                                                                                                                                                                                                                                                                                                                                                                                                                                       | <input type="text"/>                                                                                                                                                                                                                                                                                                                                                                                                                                                  |                       |
| <b>Illness #1</b>                                                                                                                                                                                                                                                                                                                                                                                                                                                     | <b>Illness #2</b>                                                                                                                                                                                                                                                                                                                                                                                                                                                     | <b>Illness #3</b>                                                                                                                                                                                                                                                                                                                                                                                                                                                     |                       |
| <b>When was this illness? (Month/year)</b>                                                                                                                                                                                                                                                                                                                                                                                                                            |                                                                                                                                                                                                                                                                                                                                                                                                                                                                       |                                                                                                                                                                                                                                                                                                                                                                                                                                                                       |                       |
| <input type="text"/> <input type="text"/>                                                                                                                                                                                                                                                                                                                                                                                                                             | <input type="text"/> <input type="text"/>                                                                                                                                                                                                                                                                                                                                                                                                                             | <input type="text"/> <input type="text"/>                                                                                                                                                                                                                                                                                                                                                                                                                             |                       |
| <b>Which of the following symptoms did your child experience during this illness? (tick all that apply)</b>                                                                                                                                                                                                                                                                                                                                                           |                                                                                                                                                                                                                                                                                                                                                                                                                                                                       |                                                                                                                                                                                                                                                                                                                                                                                                                                                                       |                       |
| <input type="checkbox"/> Fever >38 C<br><input type="checkbox"/> Chills<br><input type="checkbox"/> Cough<br><input type="checkbox"/> Shortness of breath<br><input type="checkbox"/> Alteration to taste<br><input type="checkbox"/> Alteration to smell<br><input type="checkbox"/> Nausea<br><input type="checkbox"/> Vomiting<br><input type="checkbox"/> Diarrhea<br><input type="checkbox"/> None of the above<br><input type="checkbox"/> Prefer not to answer | <input type="checkbox"/> Fever >38?C<br><input type="checkbox"/> Chills<br><input type="checkbox"/> Cough<br><input type="checkbox"/> Shortness of breath<br><input type="checkbox"/> Alteration to taste<br><input type="checkbox"/> Alteration to smell<br><input type="checkbox"/> Nausea<br><input type="checkbox"/> Vomiting<br><input type="checkbox"/> Diarrhea<br><input type="checkbox"/> None of the above<br><input type="checkbox"/> Prefer not to answer | <input type="checkbox"/> Fever >38?C<br><input type="checkbox"/> Chills<br><input type="checkbox"/> Cough<br><input type="checkbox"/> Shortness of breath<br><input type="checkbox"/> Alteration to taste<br><input type="checkbox"/> Alteration to smell<br><input type="checkbox"/> Nausea<br><input type="checkbox"/> Vomiting<br><input type="checkbox"/> Diarrhea<br><input type="checkbox"/> None of the above<br><input type="checkbox"/> Prefer not to answer |                       |
| <b>How long did this illness last?</b>                                                                                                                                                                                                                                                                                                                                                                                                                                |                                                                                                                                                                                                                                                                                                                                                                                                                                                                       |                                                                                                                                                                                                                                                                                                                                                                                                                                                                       |                       |
| <input type="text"/><br><input type="radio"/> Days<br><input type="radio"/> Weeks                                                                                                                                                                                                                                                                                                                                                                                     | <input type="text"/><br><input type="radio"/> Days<br><input type="radio"/> Weeks                                                                                                                                                                                                                                                                                                                                                                                     | <input type="text"/><br><input type="radio"/> Days<br><input type="radio"/> Weeks                                                                                                                                                                                                                                                                                                                                                                                     | <a href="#">reset</a> |
| <b>Did this illness cause your child to miss work or school/daycare?</b>                                                                                                                                                                                                                                                                                                                                                                                              |                                                                                                                                                                                                                                                                                                                                                                                                                                                                       |                                                                                                                                                                                                                                                                                                                                                                                                                                                                       |                       |
| <input type="radio"/> Yes<br><input type="radio"/> No                                                                                                                                                                                                                                                                                                                                                                                                                 | <input type="radio"/> Yes<br><input type="radio"/> No                                                                                                                                                                                                                                                                                                                                                                                                                 | <input type="radio"/> Yes<br><input type="radio"/> No                                                                                                                                                                                                                                                                                                                                                                                                                 | <a href="#">reset</a> |
| <b>Did your child need to seek medical attention?</b>                                                                                                                                                                                                                                                                                                                                                                                                                 |                                                                                                                                                                                                                                                                                                                                                                                                                                                                       |                                                                                                                                                                                                                                                                                                                                                                                                                                                                       |                       |
| <input type="radio"/> Yes<br><input type="radio"/> No                                                                                                                                                                                                                                                                                                                                                                                                                 | <input type="radio"/> Yes<br><input type="radio"/> No                                                                                                                                                                                                                                                                                                                                                                                                                 | <input type="radio"/> Yes<br><input type="radio"/> No                                                                                                                                                                                                                                                                                                                                                                                                                 | <a href="#">reset</a> |
| <p><b>You mentioned above that your child sought medical attention, did your child require hospitalization?</b></p> <p><small>* must provide value</small></p>                                                                                                                                                                                                                                                                                                        |                                                                                                                                                                                                                                                                                                                                                                                                                                                                       | <input type="radio"/> Yes<br><input type="radio"/> No<br><input type="radio"/> Prefer not to answer                                                                                                                                                                                                                                                                                                                                                                   | <a href="#">reset</a> |
| <p><b>Did your child require admission to ICU?</b></p> <p><small>* must provide value</small></p>                                                                                                                                                                                                                                                                                                                                                                     |                                                                                                                                                                                                                                                                                                                                                                                                                                                                       | <input type="radio"/> Yes<br><input type="radio"/> No<br><input type="radio"/> Prefer not to answer                                                                                                                                                                                                                                                                                                                                                                   | <a href="#">reset</a> |
| <p><b>Is your child still sick?</b></p> <p><small>* must provide value</small></p>                                                                                                                                                                                                                                                                                                                                                                                    |                                                                                                                                                                                                                                                                                                                                                                                                                                                                       | <input type="radio"/> Yes<br><input type="radio"/> No<br><input type="radio"/> Prefer not to answer                                                                                                                                                                                                                                                                                                                                                                   | <a href="#">reset</a> |
| <p><b>Has your child ever been tested for COVID-19?</b></p> <p><small>* must provide value</small></p>                                                                                                                                                                                                                                                                                                                                                                |                                                                                                                                                                                                                                                                                                                                                                                                                                                                       | <input type="radio"/> Yes<br><input type="radio"/> No<br><input type="radio"/> Prefer not to answer                                                                                                                                                                                                                                                                                                                                                                   | <a href="#">reset</a> |
| <p><b>When was your child last tested?</b></p> <p><small>* must provide value</small></p>                                                                                                                                                                                                                                                                                                                                                                             |                                                                                                                                                                                                                                                                                                                                                                                                                                                                       | mo: <input type="text"/> yr: <input type="text"/>                                                                                                                                                                                                                                                                                                                                                                                                                     |                       |
| <p><b>What was the result?</b></p> <p><small>* must provide value</small></p>                                                                                                                                                                                                                                                                                                                                                                                         |                                                                                                                                                                                                                                                                                                                                                                                                                                                                       | <input type="radio"/> Positive<br><input type="radio"/> Negative<br><input type="radio"/> Indeterminate/Inconclusive<br><input type="radio"/> I don't know<br><input type="radio"/> Prefer not to answer                                                                                                                                                                                                                                                              | <a href="#">reset</a> |

**Baseline Survey-household**

**Has your child been vaccinated against COVID-19?**  Yes  No  
 \* must provide value reset

**How many doses of the COVID-19 vaccine has your child received so far?**  One dose  Two dose  More than two dose  
 \* must provide value

**Vaccination date of first dose:**

| Day | Month | Year |
|-----|-------|------|
| ▼   | ▼     | ▼    |

\* must provide value

**Which vaccine did your child receive?**  
 \* must provide value

- Pfizer and BioNTech mRNA vaccine
- Moderna mRNA vaccine
- AstraZeneca Oxford vaccine
- Janssen (Johnson & Johnson) vaccine
- Medicago vaccine
- Novavax vaccine
- Sanofi/GSK vaccine
- Other:
- Don't know

**Vaccination date of second dose:**

| Day | Month | Year |
|-----|-------|------|
| ▼   | ▼     | ▼    |

\* must provide value

**Which vaccine did your child receive?**  
 \* must provide value

- Pfizer and BioNTech mRNA vaccine
- Moderna mRNA vaccine
- AstraZeneca Oxford vaccine
- Janssen (Johnson & Johnson) vaccine
- Medicago vaccine
- Novavax vaccine
- Sanofi/GSK vaccine
- Other:
- Don't know

**Vaccination date of additional dose:**

| Day | Month | Year |
|-----|-------|------|
| ▼   | ▼     | ▼    |

\* must provide value

**Which vaccine did your child receive?**  
 \* must provide value

- Pfizer and BioNTech mRNA vaccine
- Moderna mRNA vaccine
- AstraZeneca Oxford vaccine
- Janssen (Johnson & Johnson) vaccine
- Medicago vaccine
- Novavax vaccine
- Sanofi/GSK vaccine
- Other:
- Don't know

**Please make sure you click the "submit" button to complete your survey. Your survey responses will not be registered if you do not click "submit".**



**Follow-up Survey**

Data Access Group: [No Assignment] ?

Invitation status:

Survey options

Editing existing Record ID: 3.

Event: Visit 3 (Arm 1: Arm 1)

Record ID: 3

**BACKGROUND INFORMATION** Please answer the following questions about yourself.

**PARENTS:** if you are answering this survey on behalf of your child, please answer the questions in relation to your child.

On your last survey completed on \_\_\_\_ 04/28/2022 you indicated that you (your child) had the following medical conditions:

\_\_\_\_\_

Has there been any new or changes to your (your child's) medical conditions?  Yes  No  
\* must provide value reset

Please list your (your child's) new or changed medical condition(s):

On your last survey completed on \_\_\_\_ 04/28/2022, you indicated that you (your child) were taking following prescription medications:

\_\_\_\_\_

Has there been any new or changes to your (your child's) prescription medications?  Yes  No  Prefer not to answer  
\* must provide value reset

Please list the name of the prescription medication(s):

On your last survey completed on \_\_\_\_ 04/28/2022 you indicated ("checked") that you (your child) left home for the following reasons:

Work: **Unchecked** - \_\_\_\_

School: **Unchecked** - \_\_\_\_

Daycare: **Unchecked**

Other: **Unchecked** - \_\_\_\_

None: **Unchecked**

Decline: **Unchecked**

**Follow-up survey continued**

**Has your (your child's) job or type of schooling changed?**  
\* must provide value

Yes  
 No  
 Prefer not to answer

[reset](#)

---

**Did you (your child) leave the home to go to:**  
\* must provide value

**Work (choose all that apply)**  
 Healthcare worker  
 Essential worker (e.g. postal, grocery, delivery)  
 Personal service provider (e.g. hairdresser/barber, esthetician)  
 Teacher, Principal, School counselor etc.  
 Other, specify:  
 Prefer not to answer

**School (choose level of schooling)**  
 Preschool  
 Elementary/Primary  
 Secondary/High school  
 Post secondary (college, university or technical institute)  
 Prefer not to answer

Daycare  
 Other, specify:   
50 characters remaining  
 None of the above  
 Prefer not to answer

[reset](#)

---

Since your last survey completed on 04/28/2022:

**On average, how many times per week do you (your child) use the following transportation?**

|                                                                                                                 | never                 | less than 1/week      | 1-2 times/week        | 3-4 times/week        | 5-6 times/week        | daily                 |
|-----------------------------------------------------------------------------------------------------------------|-----------------------|-----------------------|-----------------------|-----------------------|-----------------------|-----------------------|
| <b>Public transportation</b><br><small>* must provide value</small>                                             | <input type="radio"/> | <input type="radio"/> | <input type="radio"/> | <input type="radio"/> | <input type="radio"/> | <input type="radio"/> |
| <b>Another's private vehicle (such as taxi, car pooling, ride share)</b><br><small>* must provide value</small> | <input type="radio"/> | <input type="radio"/> | <input type="radio"/> | <input type="radio"/> | <input type="radio"/> | <input type="radio"/> |

[reset](#)

---

Since your last survey completed on 04/28/2022:

**Have you (your child) had any exposure to a person who tested positive for COVID-19?**  
\* must provide value

Yes  
 No  
 I don't know  
 Prefer not to answer

[reset](#)

---

**How many people have you (your child) been exposed to?**  
\* must provide value

Less than 5 people  
 5-10 people  
 10-20 people  
 Greater than 20 people

[reset](#)

**Follow-up survey continued**

**Please identify where the most recent exposure occurred: (check all that apply)**

- Household member
- Non-household close contact (friend/other family)
- Health care setting (e.g. Dr. office, physiotherapis/chiropractor office, hospital)
- School, college, university
- Daycare
- Personal service provider (e.g. hair salon/barber, esthetician)
- Workplace
- Travel, where:
- Other, specify:
- Prefer not to answer

**When did this exposure occur?**

**Month:**

**Year:**

**At the time of exposure, do you think the person was still infectious (this is typically within the first 14 days of their illness)?**

- Yes
- No
- I don't know
- Prefer not to answer

reset

**HOUSEHOLD DETAILS**

**Other than yourself (your child), how many people currently live in your home?**

If you are a parent filling this out for your child, please include yourself in the following table as a household member. If you are a student currently living in student residence, please complete the following table for each roommate you have."

\* must provide value

| Household member #1                                           |                      |
|---------------------------------------------------------------|----------------------|
| Age in years<br>(enter as "0" for children less than 1yr old) | <input type="text"/> |
| Household member #2                                           |                      |
| Age in years<br>(enter as "0" for children less than 1yr old) | <input type="text"/> |

**Follow-up survey continued**

Since your last survey completed on 04/28/2022:

Have you (your child) been sick that included one or more of the following symptoms:

- Fever >38°C
- Chills
- Cough
- Shortness of breath
- Alteration to taste
- Alteration to smell
- Nausea
- Vomiting
- Diarrhea

- Yes  
 No  
 Prefer not to answer

[reset](#)

\* must provide value

How many times have you (your child) been sick?

\* must provide value

Please record details on the three illnesses of most concern

| Illness #1                                                                                                                   | Illness #2                                                                                                                   | Illness #3                                                                                                                   |
|------------------------------------------------------------------------------------------------------------------------------|------------------------------------------------------------------------------------------------------------------------------|------------------------------------------------------------------------------------------------------------------------------|
| <b>When was this illness? (Month/year)</b>                                                                                   |                                                                                                                              |                                                                                                                              |
| mo: <input type="text"/>                                                                                                     | mo: <input type="text"/>                                                                                                     | mo: <input type="text"/>                                                                                                     |
| yr: <input type="text"/>                                                                                                     | yr: <input type="text"/>                                                                                                     | yr: <input type="text"/>                                                                                                     |
| <b>Did this illness cause you (your child) to miss work or school/daycare?</b>                                               |                                                                                                                              |                                                                                                                              |
| <input type="radio"/> Yes<br><input type="radio"/> No<br><input type="radio"/> Prefer not to answer<br><a href="#">reset</a> | <input type="radio"/> Yes<br><input type="radio"/> No<br><input type="radio"/> Prefer not to answer<br><a href="#">reset</a> | <input type="radio"/> Yes<br><input type="radio"/> No<br><input type="radio"/> Prefer not to answer<br><a href="#">reset</a> |
| <b>Did you (your child) need to seek medical attention?</b>                                                                  |                                                                                                                              |                                                                                                                              |
| <input type="radio"/> Yes<br><input type="radio"/> No<br><input type="radio"/> Prefer not to answer<br><a href="#">reset</a> | <input type="radio"/> Yes<br><input type="radio"/> No<br><input type="radio"/> Prefer not to answer<br><a href="#">reset</a> | <input type="radio"/> Yes<br><input type="radio"/> No<br><input type="radio"/> Prefer not to answer<br><a href="#">reset</a> |

**Follow-up survey continued**

Have you (your child) ever tested positive for COVID-19? 
 Yes  
 No  
 Prefer not to answer
   
\* must provide value reset

How many times have you (your child) tested positive for COVID-19?  
\* must provide value

**Please enter your (your child's) POSITIVE tests:**

|                             | Month of Test        | Year of Test         | Test Type            |
|-----------------------------|----------------------|----------------------|----------------------|
| Positive COVID-19 Test #1:  | <input type="text"/> | <input type="text"/> | <input type="text"/> |
| Positive COVID-19 Test #2:  | <input type="text"/> | <input type="text"/> | <input type="text"/> |
| Positive COVID-19 Test #3:  | <input type="text"/> | <input type="text"/> | <input type="text"/> |
| Positive COVID-19 Test #4:  | <input type="text"/> | <input type="text"/> | <input type="text"/> |
| Positive COVID-19 Test #5:  | <input type="text"/> | <input type="text"/> | <input type="text"/> |
| Positive COVID-19 Test #6:  | <input type="text"/> | <input type="text"/> | <input type="text"/> |
| Positive COVID-19 Test #7:  | <input type="text"/> | <input type="text"/> | <input type="text"/> |
| Positive COVID-19 Test #8:  | <input type="text"/> | <input type="text"/> | <input type="text"/> |
| Positive COVID-19 Test #9:  | <input type="text"/> | <input type="text"/> | <input type="text"/> |
| Positive COVID-19 Test #10: | <input type="text"/> | <input type="text"/> | <input type="text"/> |

**Follow-up survey continued**

| COVID-19 Vaccinations                                                                                                                                                                                                                                                                                            |                                                                                                                                                      |                                                                                                                                                                                                                                                                                                                                                                                                                                                                                                                                                 |
|------------------------------------------------------------------------------------------------------------------------------------------------------------------------------------------------------------------------------------------------------------------------------------------------------------------|------------------------------------------------------------------------------------------------------------------------------------------------------|-------------------------------------------------------------------------------------------------------------------------------------------------------------------------------------------------------------------------------------------------------------------------------------------------------------------------------------------------------------------------------------------------------------------------------------------------------------------------------------------------------------------------------------------------|
| <p>On previous surveys, you indicated that you (your child) had received the following <b>Dose 1</b> of the COVID-19 vaccines:</p> <p style="text-align: center;">07-04-2022, Pfizer and BioNTech mRNA vaccine</p>                                                                                               |                                                                                                                                                      |                                                                                                                                                                                                                                                                                                                                                                                                                                                                                                                                                 |
| <p><b>Is this dose 1 information correct?</b></p> <p>If the field is empty, and you <u>have received</u> a dose 1 vaccine, please select "No"</p> <p style="text-align: right;"> <input type="radio"/> Yes<br/> <input checked="" type="radio"/> No                 </p> <p style="text-align: right;">reset</p> |                                                                                                                                                      |                                                                                                                                                                                                                                                                                                                                                                                                                                                                                                                                                 |
| <p>* must provide value</p>                                                                                                                                                                                                                                                                                      |                                                                                                                                                      |                                                                                                                                                                                                                                                                                                                                                                                                                                                                                                                                                 |
| <p>Please enter new or updated <b>Dose 1</b> information:</p>                                                                                                                                                                                                                                                    | <p><b>Vaccination Date</b></p> <p><input type="text"/>  D-M-Y</p>   | <p><b>Type of Vaccination</b></p> <p> <input type="radio"/> Pfizer and BioNTech mRNA vaccine<br/> <input type="radio"/> Moderna mRNA vaccine<br/> <input type="radio"/> AstraZeneca Oxford vaccine<br/> <input type="radio"/> Janssen (Johnson &amp; Johnson) vaccine<br/> <input type="radio"/> Medicago vaccine<br/> <input type="radio"/> Novavax vaccine<br/> <input type="radio"/> Sanofi/GSK vaccine<br/> <input type="radio"/> Other:<br/> <input type="radio"/> Don't know                 </p> <p style="text-align: right;">reset</p> |
| <p>On previous surveys, you indicated that you (your child) had received the following <b>Dose 2</b> of the COVID-19 vaccines:</p>                                                                                                                                                                               |                                                                                                                                                      |                                                                                                                                                                                                                                                                                                                                                                                                                                                                                                                                                 |
| <p><b>Is this dose 2 information correct?</b></p> <p>If the field is empty, and you <u>have received</u> a dose 2 vaccine, please select "No"</p> <p style="text-align: right;"> <input type="radio"/> Yes<br/> <input checked="" type="radio"/> No                 </p> <p style="text-align: right;">reset</p> |                                                                                                                                                      |                                                                                                                                                                                                                                                                                                                                                                                                                                                                                                                                                 |
| <p>* must provide value</p>                                                                                                                                                                                                                                                                                      |                                                                                                                                                      |                                                                                                                                                                                                                                                                                                                                                                                                                                                                                                                                                 |
| <p>Please enter new or updated <b>Dose 2</b> information:</p>                                                                                                                                                                                                                                                    | <p><b>Vaccination Date</b></p> <p><input type="text"/>  D-M-Y</p> | <p><b>Type of Vaccination</b></p> <p> <input type="radio"/> Pfizer and BioNTech mRNA vaccine<br/> <input type="radio"/> Moderna mRNA vaccine<br/> <input type="radio"/> AstraZeneca Oxford vaccine<br/> <input type="radio"/> Janssen (Johnson &amp; Johnson) vaccine<br/> <input type="radio"/> Medicago vaccine<br/> <input type="radio"/> Novavax vaccine<br/> <input type="radio"/> Sanofi/GSK vaccine<br/> <input type="radio"/> Other:<br/> <input type="radio"/> Don't know                 </p> <p style="text-align: right;">reset</p> |
| <p>On previous surveys, you indicated that you (your child) had received the following <b>Dose 3</b> of the COVID-19 vaccines:</p>                                                                                                                                                                               |                                                                                                                                                      |                                                                                                                                                                                                                                                                                                                                                                                                                                                                                                                                                 |
| <p><b>Is this dose 3 information correct?</b></p> <p>If the field is empty, and you <u>have received</u> a dose 3 vaccine, please select "No"</p> <p style="text-align: right;"> <input type="radio"/> Yes<br/> <input checked="" type="radio"/> No                 </p> <p style="text-align: right;">reset</p> |                                                                                                                                                      |                                                                                                                                                                                                                                                                                                                                                                                                                                                                                                                                                 |
| <p>* must provide value</p>                                                                                                                                                                                                                                                                                      |                                                                                                                                                      |                                                                                                                                                                                                                                                                                                                                                                                                                                                                                                                                                 |

|                                                        |                                                                                                              |                                                                                                                                                                                                                                                                                                                                                                                                                                                                   |
|--------------------------------------------------------|--------------------------------------------------------------------------------------------------------------|-------------------------------------------------------------------------------------------------------------------------------------------------------------------------------------------------------------------------------------------------------------------------------------------------------------------------------------------------------------------------------------------------------------------------------------------------------------------|
| Please enter new or updated <b>Dose 3</b> information: | Vaccination Date                                                                                             | Type of Vaccination                                                                                                                                                                                                                                                                                                                                                                                                                                               |
|                                                        | <input type="text"/>  D-M-Y | <input type="radio"/> Pfizer and BioNTech mRNA vaccine<br><input type="radio"/> Moderna mRNA vaccine<br><input type="radio"/> AstraZeneca Oxford vaccine<br><input type="radio"/> Janssen (Johnson & Johnson) vaccine<br><input type="radio"/> Medicigo vaccine<br><input type="radio"/> Novavax vaccine<br><input type="radio"/> Sanofi/GSK vaccine<br><input type="radio"/> Other:<br><input type="radio"/> Don't know <span style="float: right;">reset</span> |

On previous surveys, you indicated that you (your child) had received the following **Dose 4 of the COVID-19 vaccines:**

---

**Is this dose 4 information correct?**

If the field is empty, and you have received a dose 4 vaccine, please select "No"

Yes  
 No

\* must provide value reset

|                                                        |                                                                                                                |                                                                                                                                                                                                                                                                                                                                                                                                                                                                   |
|--------------------------------------------------------|----------------------------------------------------------------------------------------------------------------|-------------------------------------------------------------------------------------------------------------------------------------------------------------------------------------------------------------------------------------------------------------------------------------------------------------------------------------------------------------------------------------------------------------------------------------------------------------------|
| Please enter new or updated <b>Dose 4</b> information: | Vaccination Date                                                                                               | Type of Vaccination                                                                                                                                                                                                                                                                                                                                                                                                                                               |
|                                                        | <input type="text"/>  D-M-Y | <input type="radio"/> Pfizer and BioNTech mRNA vaccine<br><input type="radio"/> Moderna mRNA vaccine<br><input type="radio"/> AstraZeneca Oxford vaccine<br><input type="radio"/> Janssen (Johnson & Johnson) vaccine<br><input type="radio"/> Medicigo vaccine<br><input type="radio"/> Novavax vaccine<br><input type="radio"/> Sanofi/GSK vaccine<br><input type="radio"/> Other:<br><input type="radio"/> Don't know <span style="float: right;">reset</span> |

On previous surveys, you indicated that you (your child) had received the following **Dose 5 of the COVID-19 vaccines:**

---

**Is this dose 5 information correct?**

If the field is empty, and you have received a dose 5 vaccine, please select "No"

Yes  
 No

\* must provide value reset

|                                                        |                                                                                                                |                                                                                                                                                                                                                                                                                                                                                                                                                                                                   |
|--------------------------------------------------------|----------------------------------------------------------------------------------------------------------------|-------------------------------------------------------------------------------------------------------------------------------------------------------------------------------------------------------------------------------------------------------------------------------------------------------------------------------------------------------------------------------------------------------------------------------------------------------------------|
| Please enter new or updated <b>Dose 5</b> information: | Vaccination Date                                                                                               | Type of Vaccination                                                                                                                                                                                                                                                                                                                                                                                                                                               |
|                                                        | <input type="text"/>  D-M-Y | <input type="radio"/> Pfizer and BioNTech mRNA vaccine<br><input type="radio"/> Moderna mRNA vaccine<br><input type="radio"/> AstraZeneca Oxford vaccine<br><input type="radio"/> Janssen (Johnson & Johnson) vaccine<br><input type="radio"/> Medicigo vaccine<br><input type="radio"/> Novavax vaccine<br><input type="radio"/> Sanofi/GSK vaccine<br><input type="radio"/> Other:<br><input type="radio"/> Don't know <span style="float: right;">reset</span> |
